# Supplementary material
Source: publisher figshare collection journal article supplement (https://gsajournals.figshare.com/ndownloader/files/18009608)
Supplement: Supplementary file 1 [file 18009608]

## Sheet: Sheet1
Table S9. The linear regression of various flowering traits in IBM X Oy1-N1989/+:B73 F1 progenies on to the normalized OY1 expression data (RPKM) derived from shoot apices of 14 days old corresponding IBM-RILs (n=74) seedlings.
Trait/Marker	R2 (%)	P-value
isu085b	19.2	<0.0001
MT_DTA	20.7	<0.0001
WT_DTA	0.19	0.96
MT_DTS	18.2	<0.0002
WT_DTS	0.02	0.9
Ratio_DTA	17.5	<0.0002
Ratio_DTS	14.7	<0.0007
Diff_DTA	18.8	<0.0001
Diff_DTS	15.4	<0.0006
MT_ASI	1.2	0.34
WT_ASI	0.1	0.81
Diff_ASI	1.4	0.31
